# Supplementary material
Source: PubMed Central journal article supplement (PMC4375339)
Supplement: AEM.00058-15_zam999116176so1.pdf [file AEM.00058-15_zam999116176so1.pdf]

Figure S1 – Alignment of the *fur* gene 103 Vibrionaceae strains. *Shewanella xiamenensis* BC01 is used as outlier.

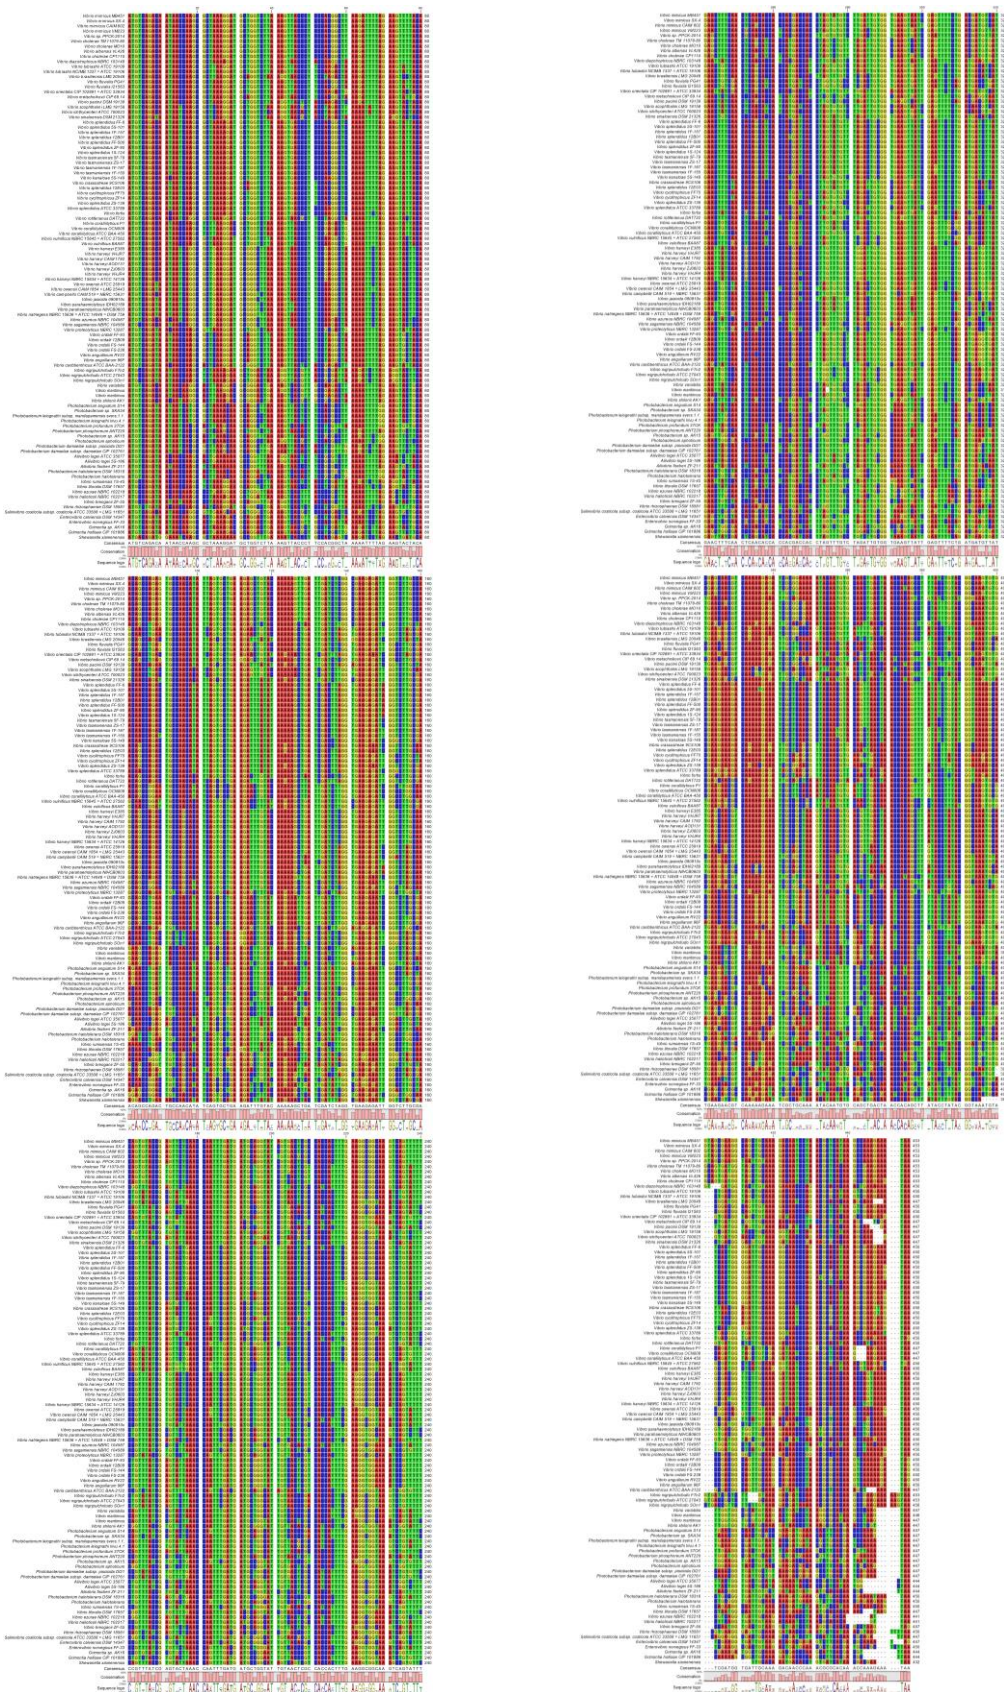

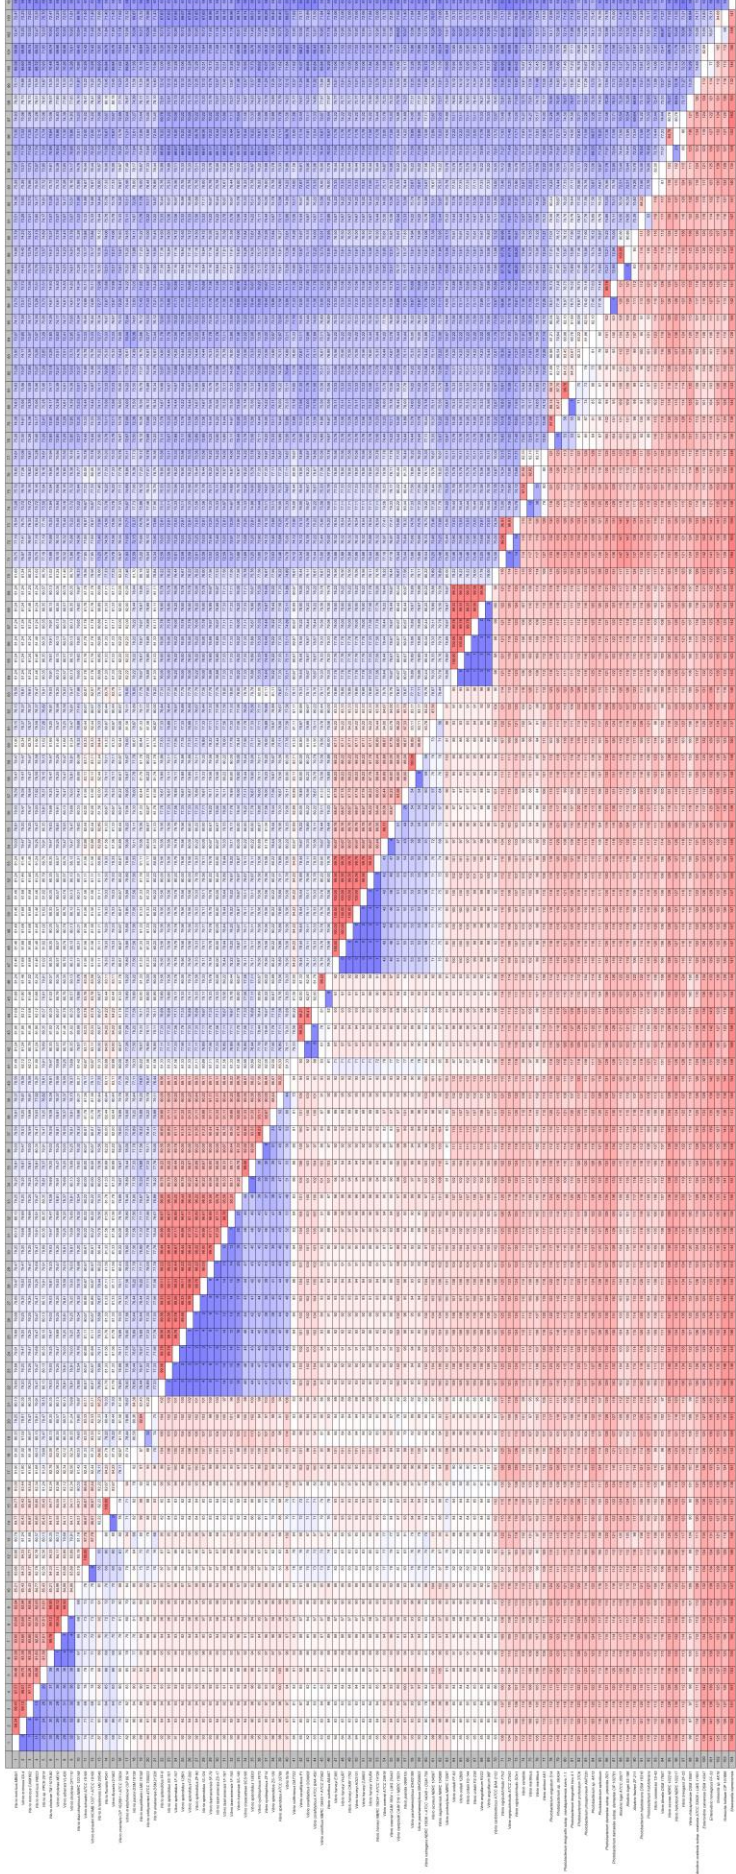

Figure S2 – Heat Map generated using the 103 strains used in the *in silico* study. From the diagonal up, the representation of the percentage of identity between the strains and from the diagonal down, the number of differences registered in the *fur* gene.
